# Supplementary material
Source: PubMed Central journal article supplement (PMC1851575)

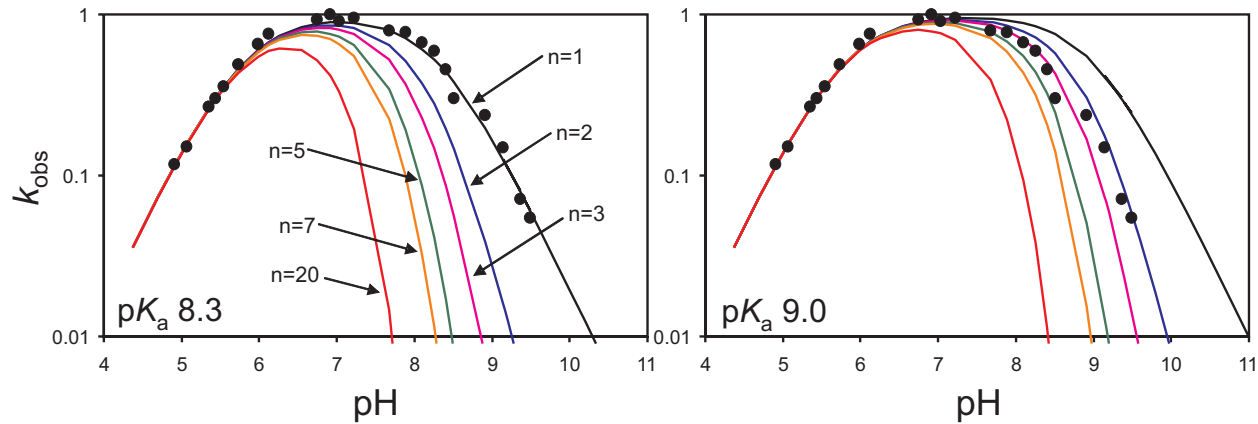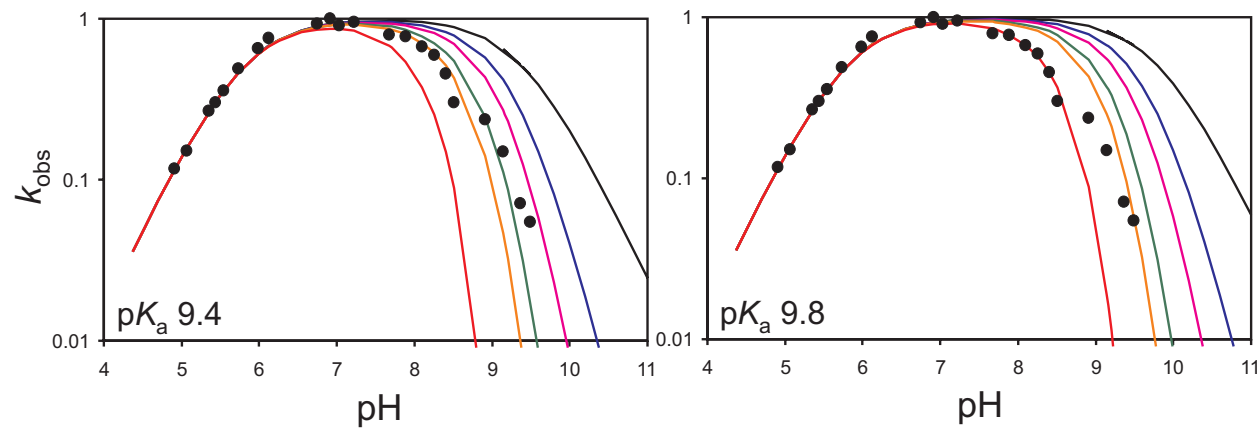

Supplement: pnas_0608864104_1.pdf [file pnas_0608864104_1.pdf]

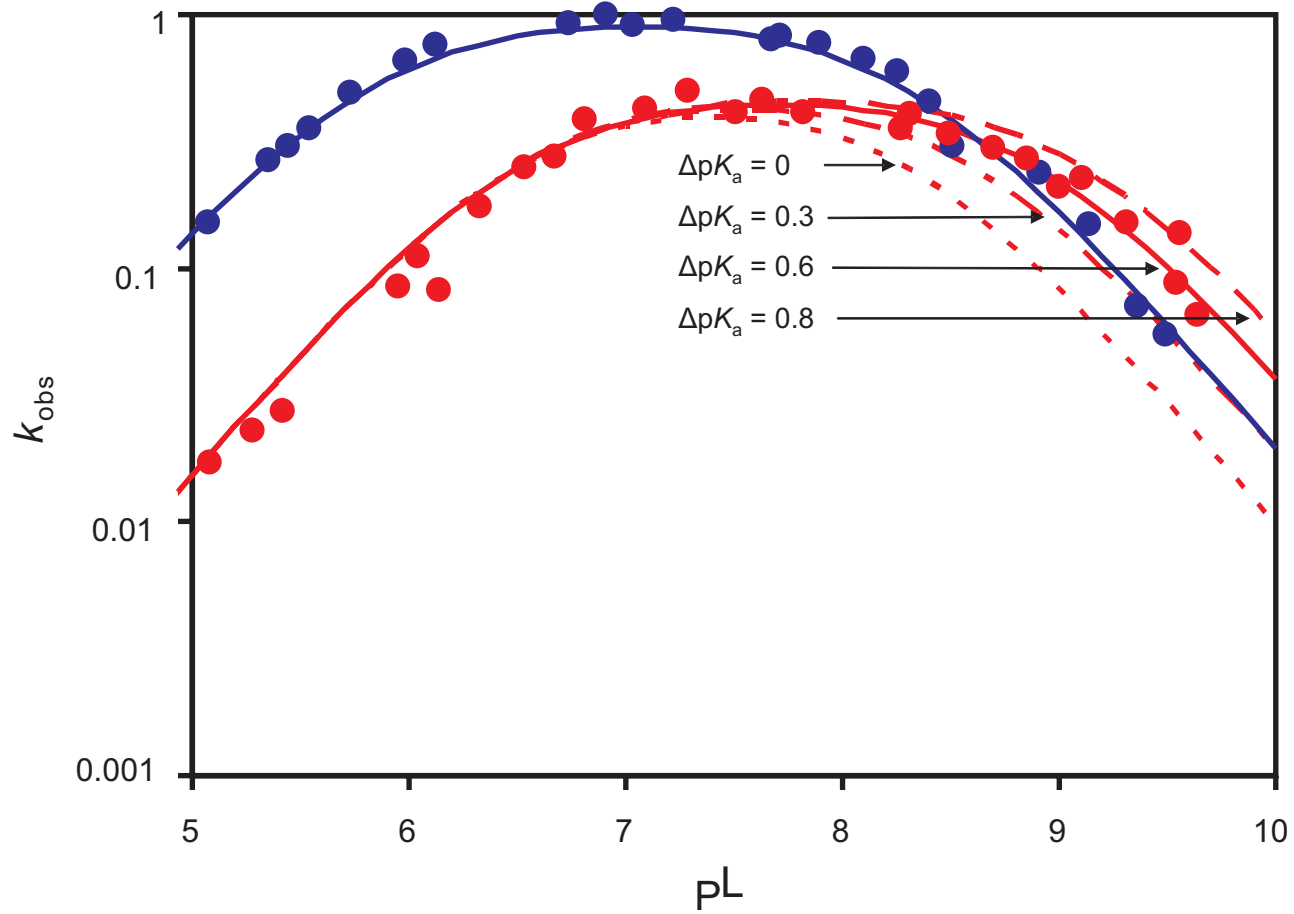

Supplement: pnas_0608864104_2.pdf [file pnas_0608864104_2.pdf]

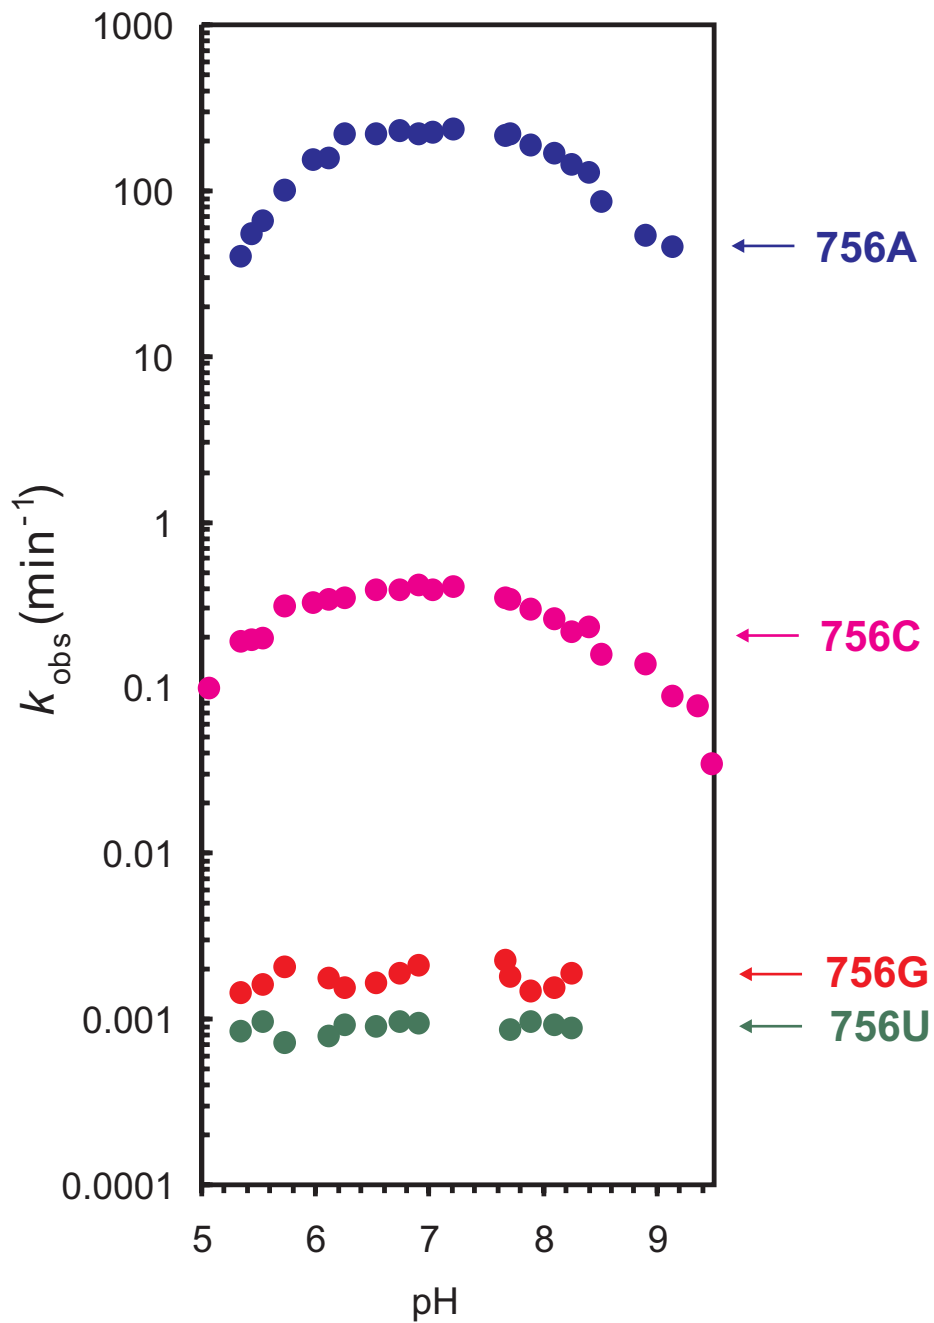

Supplement: pnas_0608864104_3.pdf [file pnas_0608864104_3.pdf]
